# Supplementary material
Source: PubMed Central journal article supplement (PMC5177537)
Supplement: NIHMS816791-supplement-Figure_S1.pdf [file NIHMS816791-supplement-Figure_S1.pdf]

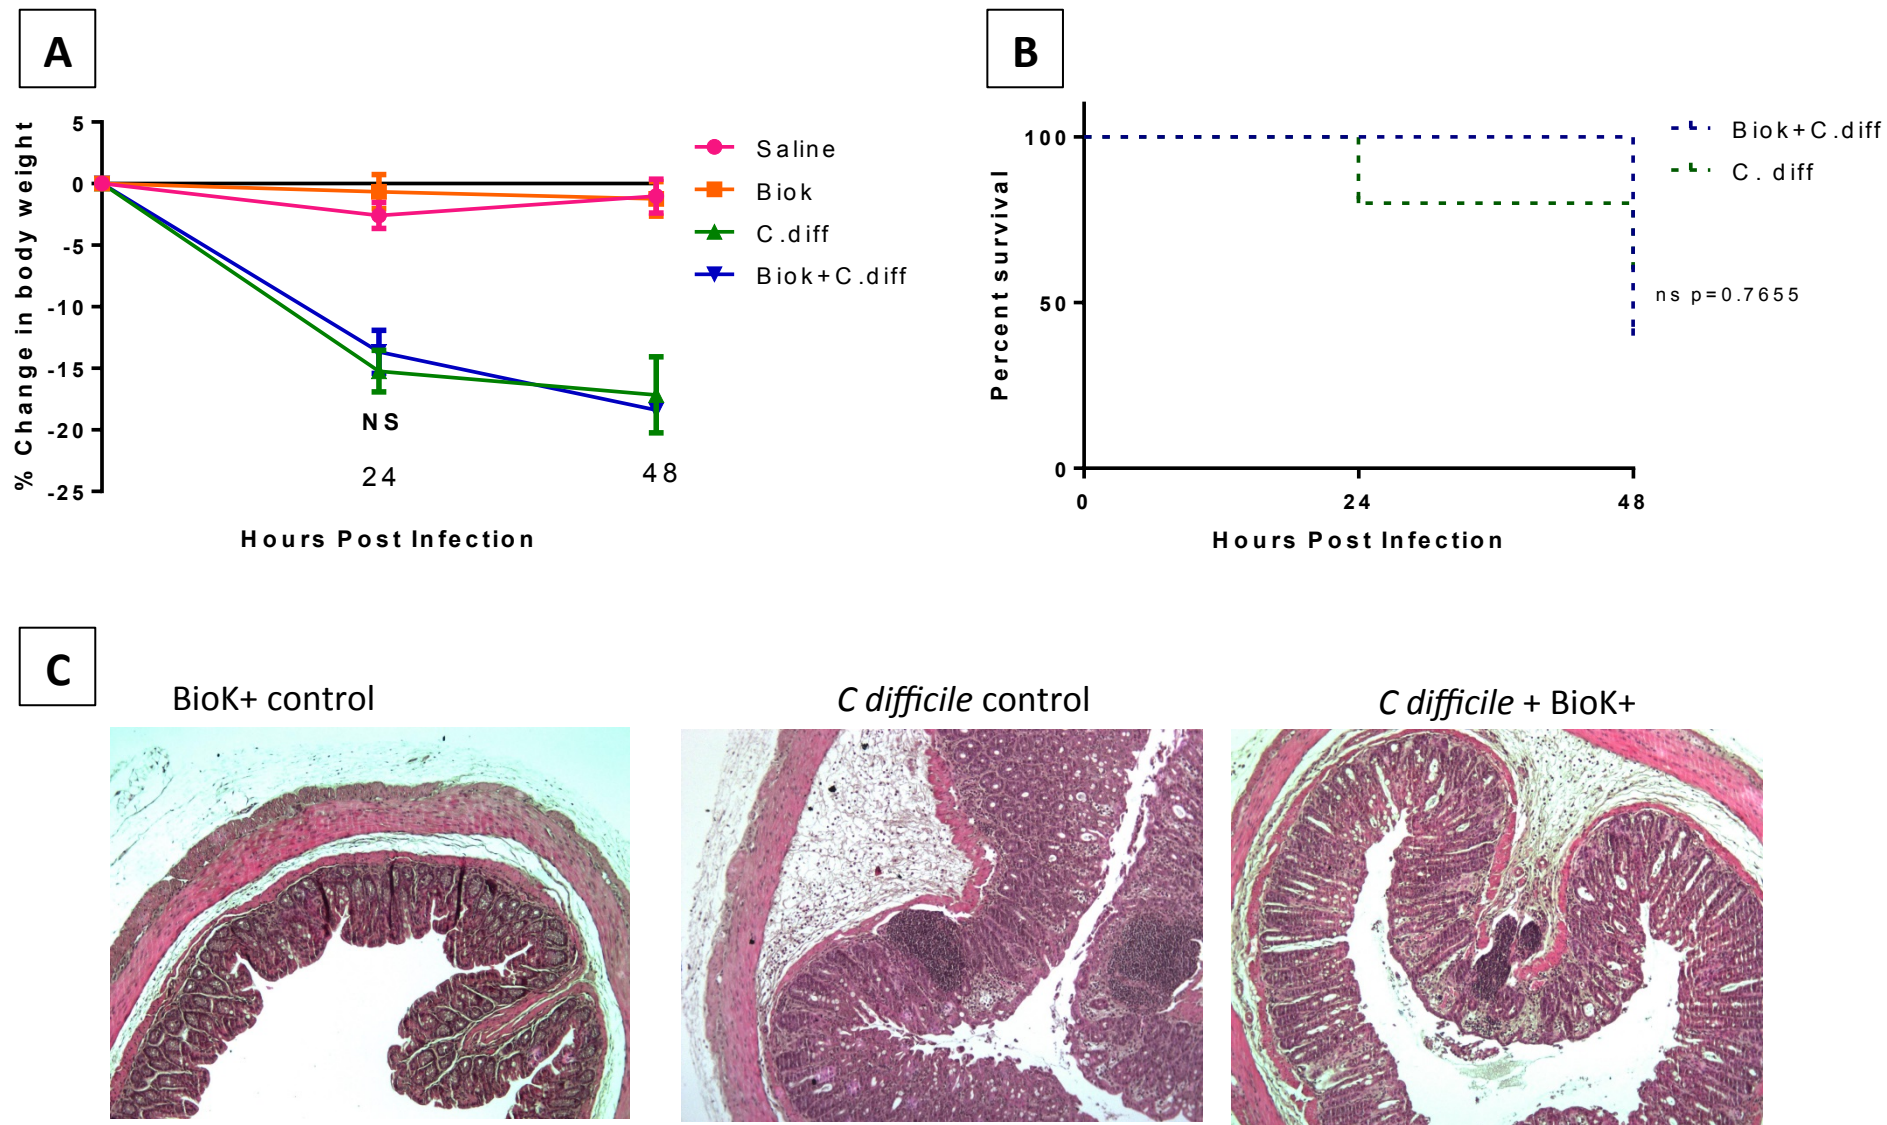

**Figure S1: BioK+ probiotic is not protective in an antibiotic mouse model of *C. difficile* colitis.** C57BL/6 mice were treated with a mixture of broad-spectrum antibiotics and then orally administered  $3.5 \times 10^8$  cells of BioK+ (in 100ul saline) or saline alone, followed by  $10^5$  cells of *C. difficile* strain 027 or saline 24 hours later, as described in methods. No significant differences were seen in terms of weight loss (**Panel A**), survival (**Panel B**), or histology (**Panel C**) in the infected mice receiving BioK+ compared to *C. difficile* infection controls.
