# Supplementary material
Source: PubMed Central journal article supplement (PMC5177537)
Supplement: NIHMS816791-supplement-Figure_S3.pdf [file NIHMS816791-supplement-Figure_S3.pdf]

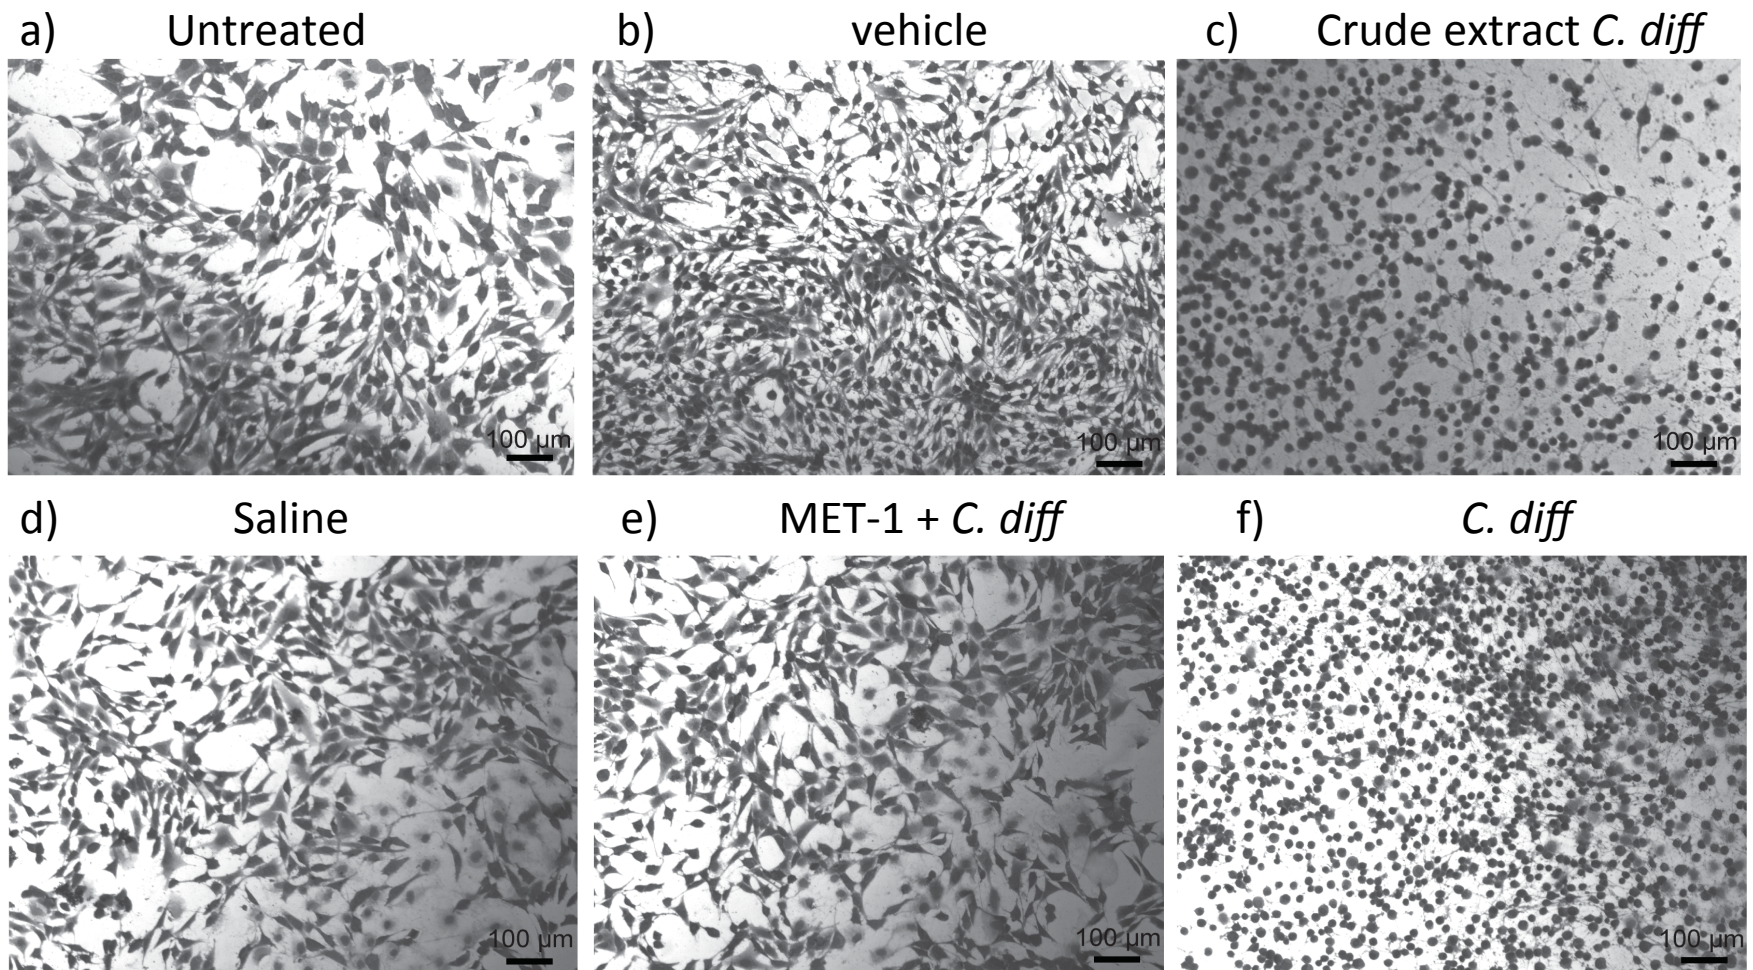

**Figure S3. MET-1 confers protection against *C. difficile* 027 cytotoxicity.** Representative photos at 10x magnification of NIH 3T3 fibroblasts exposed to stool extracts from mice for 1 hour at 37 °C (see also Figure 4 in manuscript). (a) Untreated NIH 3T3 fibroblasts. (b) Fibroblast treated with vehicle control, (c) Crude extract from pure *C. difficile* culture (positive control), (d) Supernatant stool from mice gavaged with saline solution, (e) Supernatant stool from mice gavaged with MET-1 + *C. diff* and (f) Supernatant stool from mice gavaged with *C. diff* + saline.
